# Supplementary material for: Late-life restoration of mitochondrial function reverses cardiac dysfunction in old mice
Source: eLife journal article supplement (doi:10.7554/elife.55513), 2020-07-10
Supplement: fig2-data2 [file MitoPY1 image description.docx]

**Images for MitoPY1/MitoTracker Deep Red measurement**

The LIF files in this folder can be opened with Fiji software. Each LIF file contains images of one to multiple cardiomyocytes isolated from a control (saline) or a SS-31-treated mouse as indicated in the image name. For each image, MitoPY1 signal was captured in Channel 1 and MitoTracker Deep Red signal was captured in Channel 2. The intensity ratio of MitoPY1/ MitoTracker Deep Red (ie. Channel 1/Channel 2) was calculated for each cell.
